# Supplementary material
Source: MDPI journal article supplement (https://www.mdpi.com/2073-4360/7/10/1506)
Supplement: s1 [file s1]

## Supplementary Materials

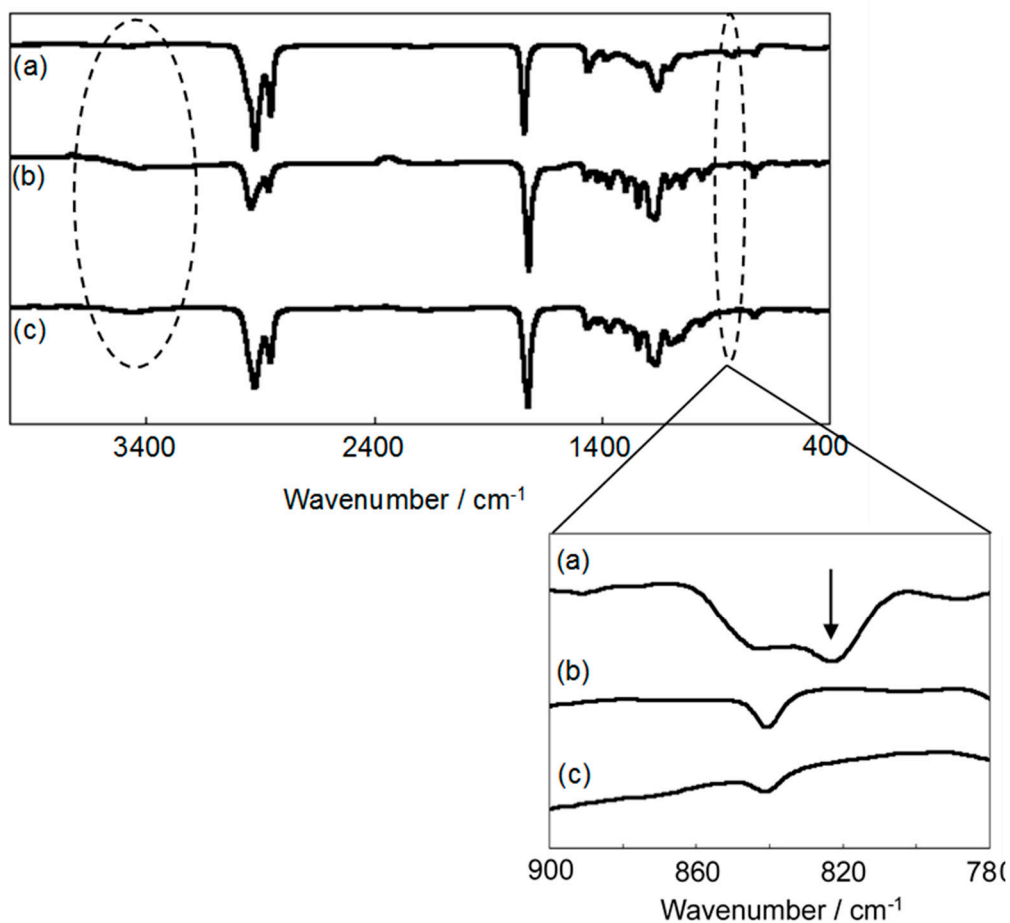

**Figure S1.** FT-IR spectra of (a) ESO, (b) PCL, and (c) polyESO/PCL.

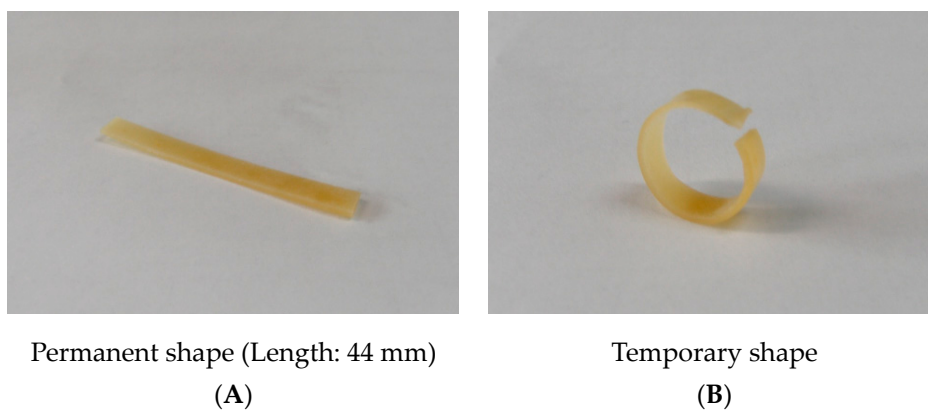

**Figure S2.** Photographs of (A) permanent shape and (B) temporary shape for evaluation of shape memory-recovery property.

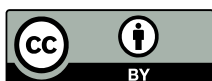

© 2015 by the authors; licensee MDPI, Basel, Switzerland. This article is an open access article distributed under the terms and conditions of the Creative Commons by Attribution (CC-BY) license (<http://creativecommons.org/licenses/by/4.0/>).
